# Supplementary material
Source: PubMed Central journal article supplement (PMC5810360)
Supplement: NIHMS940171-supplement-Supplemental.pdf [file NIHMS940171-supplement-Supplemental.pdf]

# Simultaneous Profiling of DNA Mutation and Methylation by Melting Analysis Using Magnetoresistive Biosensor Array

*Giovanni Rizzi<sup>†</sup>, Jung-Rok Lee<sup>‡,§</sup>, Christina Dahl<sup>⊥</sup>, Per Guldborg<sup>⊥</sup>, Martin Dufva<sup>†</sup>,*

*Shan X. Wang<sup>\*,§,||</sup>, Mikkel F. Hansen<sup>\*,†</sup>*

<sup>†</sup>Department of Micro- and Nanotechnology DTU Nanotech, Building 345B, Technical University of Denmark, Kongens Lyngby, DK 2800, Denmark

<sup>‡</sup>Division of Mechanical and Biomedical Engineering, ELTEC College of Engineering, Ewha Womans University, Seoul 03760, South Korea

<sup>§</sup>Department of Materials Science and Engineering, Stanford University, Stanford, CA 93405, USA

<sup>⊥</sup>Danish Cancer Society Research Center, Copenhagen, DK 2100, Denmark

<sup>||</sup> Department of Electrical Engineering, Stanford University, Stanford, CA 93405, USA

## AUTHOR INFORMATION

Corresponding Authors

\* e-mail: [sxwang@stanford.edu](mailto:sxwang@stanford.edu)

\*e-mail: [Mikkel.Hansen@nanotech.dtu.dk](mailto:Mikkel.Hansen@nanotech.dtu.dk)

**Table S1:** List of ssDNA probes used for mutation and methylation profiling.

| GENE                               | Site        | $T_m$<br>[°C]* | Sequence**                                                 |
|------------------------------------|-------------|----------------|------------------------------------------------------------|
| <i>BRAF</i> Exon 11<br>NM_004333.4 | c.1391G>A   | 44.7           | NH2-C6-5'-(9xT)AAATGATCCAGATCCAATTCTTTGTCC-3'              |
|                                    | WT          | 44.7           | NH2-C6-5'-(9xT) AATGATCCAGATTCAATTCTTTGTCCC-3'             |
| <i>BRAF</i> Exon 15<br>NM_004333.4 | c.1799T>A   | 46.3           | NH2-C6-5'-(9xT) CTCCATCGAGATTTCTTCTGTAGCTAGAC-3'           |
|                                    | c.1798GT>AA | 46.6           | NH2-C6-5'-(9xT) TCCATCGAGATTTCTTTGTAGCTAGACC-3'            |
|                                    | WT          | 46.4           | NH2-C6-5'-(9xT) TCCATCGAGATTTCACTGTAGCTAGAC-3'             |
| <i>NRAS</i> Exon 2<br>NM_002524.4  | c.181C>A    | 45.3           | NH2-C6-5'-(9xT) ACTGTACTCTTCTTTTCCAGCTGT-3'                |
|                                    | c.182A>T    | 45.5           | NH2-C6-5'-(9xT) ACTGTACTCTTCTAAGTCCAGCTGTA-3'              |
|                                    | WT          | 45.5           | NH2-C6-5'-(9xT) CTGTACTCTTCTTGTCCAGCTGT-3'                 |
| <i>KIT</i> Promoter                | P1 Meth     | 46.5           | NH2-C6-5'-(9xT) CCCAAAACCGCGAACGAC-3'                      |
|                                    | P1 uMeth    | 46.4           | NH2-C6-5'-(9xT)CCCCAAAACCACAAACAACAA-3'                    |
| <i>KIT</i> Promoter                | P2 Meth     | 46.4           | NH2-C6-5'-(9xT) GAACGCGACAAAACCGAAC-3'                     |
|                                    | P2 uMeth    | 46.5           | NH2-C6-5'-(9xT) ACAAACACAACAAAACCAAACCC-3'                 |
| <i>RARB</i> Promoter               | P1 Meth     | 44.0           | NH2-C6-5'-(9xT) ATCCTCAAACAACCTCGCATAAAAAAATTC-3'          |
|                                    | P1 uMeth    | 43.8           | NH2-C6-5'-(9xT)AATCCTCAAACAACCTCACATAAAAAAATTC-3'          |
| <i>RARB</i> Promoter               | P2 Meth     | 45.6           | NH2-C6-5'-(9xT) GAATCCTACCCCGACGATACC -3'                  |
|                                    | P2 uMeth    | 45.7           | NH2-C6-5'-(9xT) AAATCCTACCCCAACAATACCCA -3'                |
| Reference                          | Positive    |                | NH2-C6-5'-(9xT) TGC GAG CTT CGT ATT ATG GCG -3' TEG Biotin |
|                                    | Negative    |                | NH2-C6-5'-(9xT) GTGGGGCTAGGTG -3'                          |

\*Theoretical melting temperatures ( $T_m$ ) were calculated with nearest neighbour (NN) model for 10 mM Na<sup>+</sup> ionic concentration. Probes were designed to have matched  $T_m$ .

\*\* All probes are amino-labelled to bind to GMR sensor surfaces.

**Table S2:** PCR primers for amplification of EST cell line genomic DNA.

| GENE                               | Sequence                                      | Product length |
|------------------------------------|-----------------------------------------------|----------------|
| <i>BRAF</i> Exon 11<br>NM_004333.4 | fw: biotin-C6-5'-TTGACTTTTTTACTGTTTTTATC-3'   | 167bp          |
|                                    | bw: 5'-ATGTCACCACATTACATACTTAC-3'             |                |
| <i>BRAF</i> Exon 15<br>NM_004333.4 | fw: biotin- C6-5'- TTTTCTTTACTTACTACACCTC -3' | 167bp          |
|                                    | bw: 5'- GGAAAAATAGCCTCAATTCT -3'              |                |
| <i>NRAS</i> Exon 2<br>NM_002524.4  | fw: biotin- C6-5'- CAAGTGGTTATAGATGGTGA -3'   | 110bp          |
|                                    | bw: 5'- AGGAAGCCTTCGCCTGTCCT -3'              |                |
| <i>KIT</i> Promoter*               | fw: biotin- C6-5'- GGGAGGAGGGGTTGTTGTT -3'    | 82bp           |
|                                    | bw: 5'- TTCCAACCTCTCCCCCAAATACAAC -3'         |                |
| <i>RARB</i> Promoter*              | fw: biotin- C6-5'- GGTTTATTTTTGTTAAAGGGG -3'  | 179bp          |
|                                    | bw: 5'- AAAAATCCCAAATTCTCCTC -3'              |                |

\**KIT* and *RARB* primers were designed to amplify bisulphite converted promoter region.

**Table S3:** Primers for pyrosequencing *KIT* and *RARB* promoter regions of bisulphite converted DNA from EST cell lines.

| Gene                 | Sequence                                                                                                                                            |
|----------------------|-----------------------------------------------------------------------------------------------------------------------------------------------------|
| <i>KIT</i> Promoter  | fw: 5'- GTGGAAAGGTGGAGAGAGAAA -3'<br>bw: biotin-5'- TTCCA ACTCTCCCCCAAATACAAC -3'<br>S1: 5'- GAGGAGGGGTTGTTG -3'                                    |
| <i>RARB</i> promoter | fw: biotin- C6-5'- GGTTTATTTTTTGTAAAGGGG -3'<br>bw: 5'- AAAAATCCCAAATTCTCCTTC -3'<br>S1: 5'- ACATCCCAATCCTCA -3'<br>S2: 5'- ATACTTACAAAAACCTTCC -3' |

**Table S4:** Parameters from linear fitting of  $\Delta T_m$  vs. methylation density by pyrosequencing (Figure 5). Numbers in parenthesis are standard errors on the last digits from the fitting routine.

| Location       | Slope [ $^{\circ}\text{C}/\%$ ] | Intercept [ $^{\circ}\text{C}$ ] | $R^2$ |
|----------------|---------------------------------|----------------------------------|-------|
| <i>KIT</i> p1  | 0.22(1)                         | -9(1)                            | 0.97  |
| <i>KIT</i> p2  | 0.25(1)                         | -8.8(7)                          | 0.98  |
| <i>RARB</i> p1 | 0.075(5)                        | -5.1(2)                          | 0.97  |
| <i>RARB</i> p2 | 0.22(2)                         | -9.3(7)                          | 0.94  |

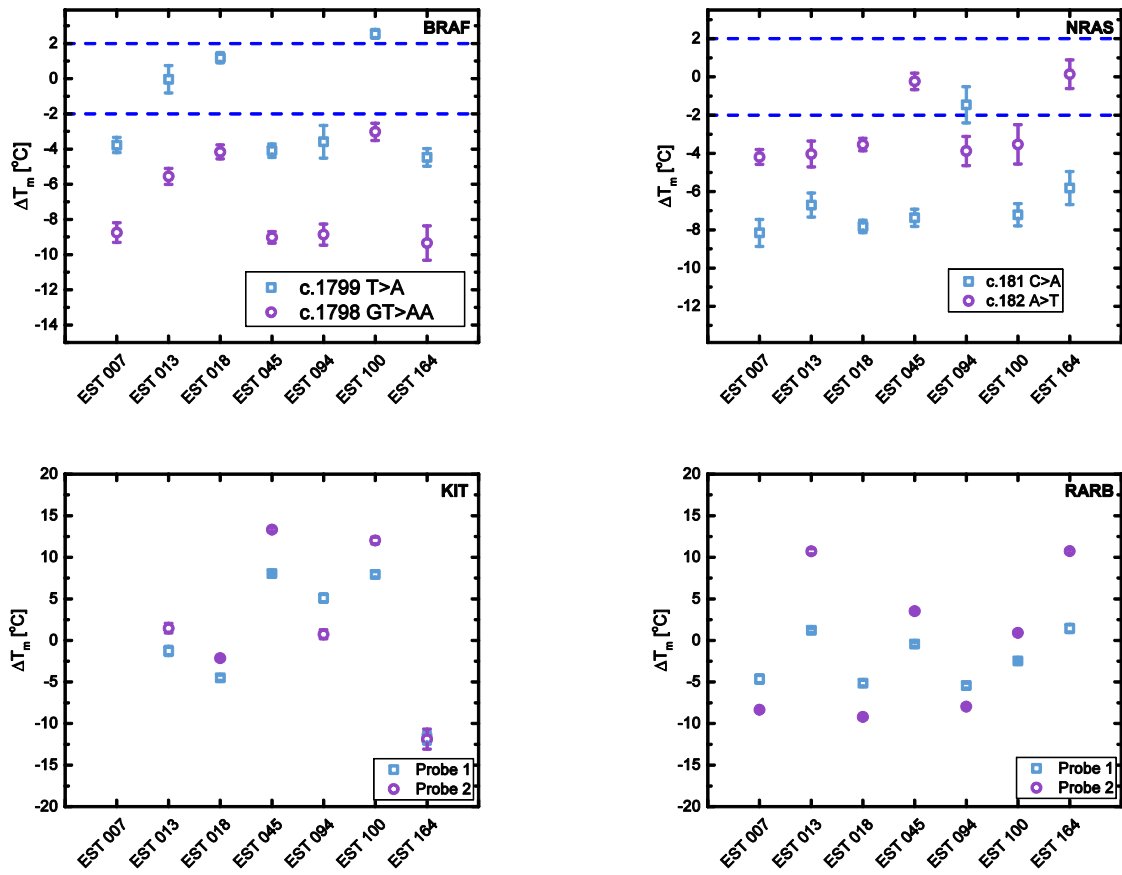

**Figure S1:**  $\Delta T_m$  measured for all investigated probes for the seven investigated cell lines. Error bars are one standard deviation ( $n = 4-6$ ).

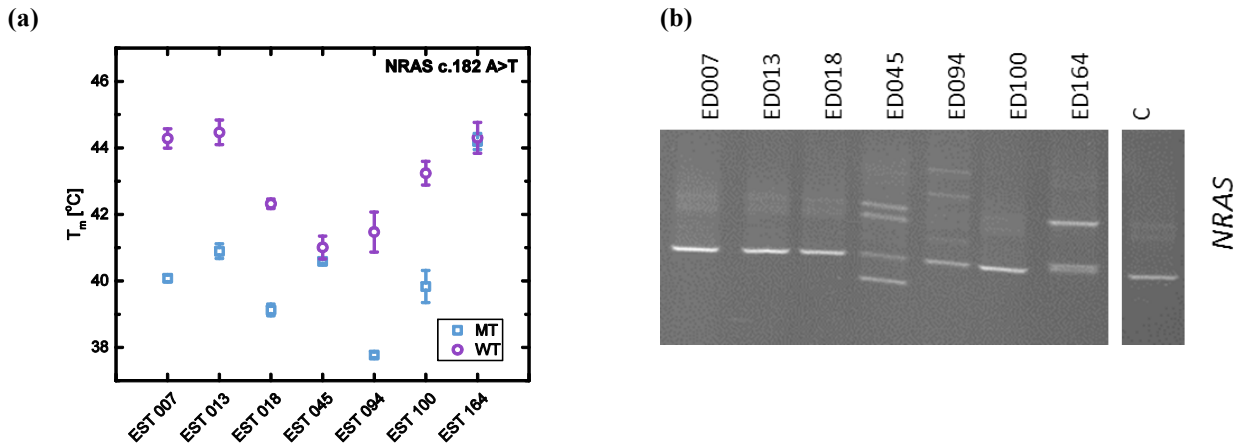

**Figure S2:** (a) Absolute melting temperatures ( $T_m$ ) measured for WT and MT probes targeting *NRAS* c.182 A>T mutation.  $T_m$  (WT) and  $T_m$  (MT) for EST045 showed approximately the same value of about 41°C. For both probes, the melting temperature was significantly lower than the maximum one (about 44°C). This can be explained by the target having a mutation different from the one targeted by the MT probe. (b) Denaturing gradient gel electrophoresis of *NRAS* exon 2 PCR products. EST045 is heterozygous mutant for a different mutation than the one present in EST164.

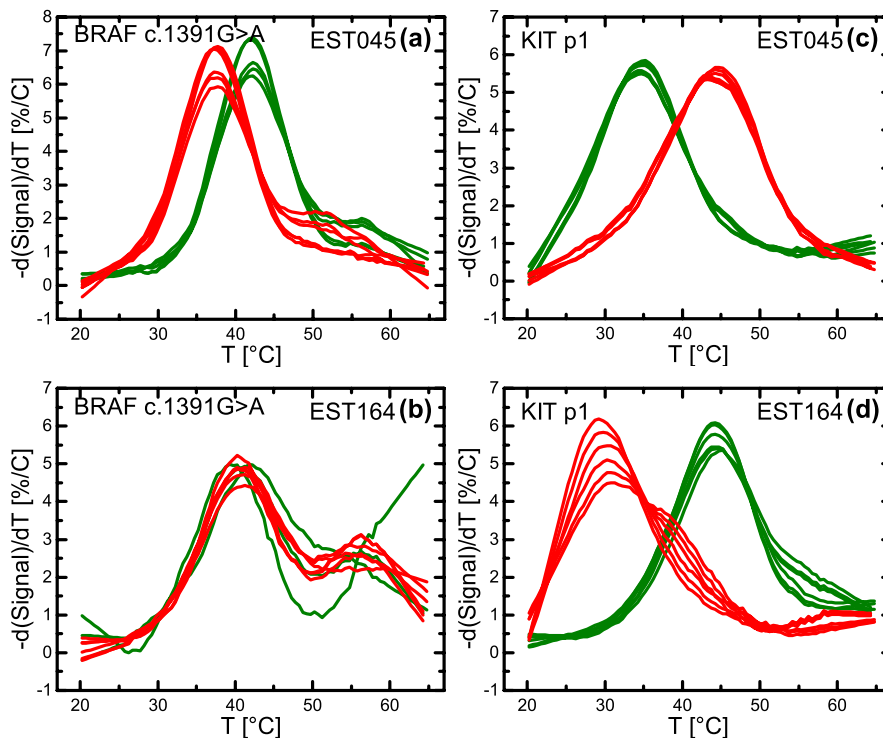

**Figure S3:** First temperature derivatives of the melting curves of Figures 2-3. Melting curves measured for (a,b) *BRAF* c.1391G>A mutation and (c,d) *KIT* p1 methylation sites. The curves were measured for (a,c) EST045 and (b,d) EST164 cell lines respectively. The curves show reproducible single peaks in most cases. In panel (b) two peaks are clearly visible for both WT (green) and MT (red) probes. This is compatible with the expectation for a heterozygous mutant cell line.

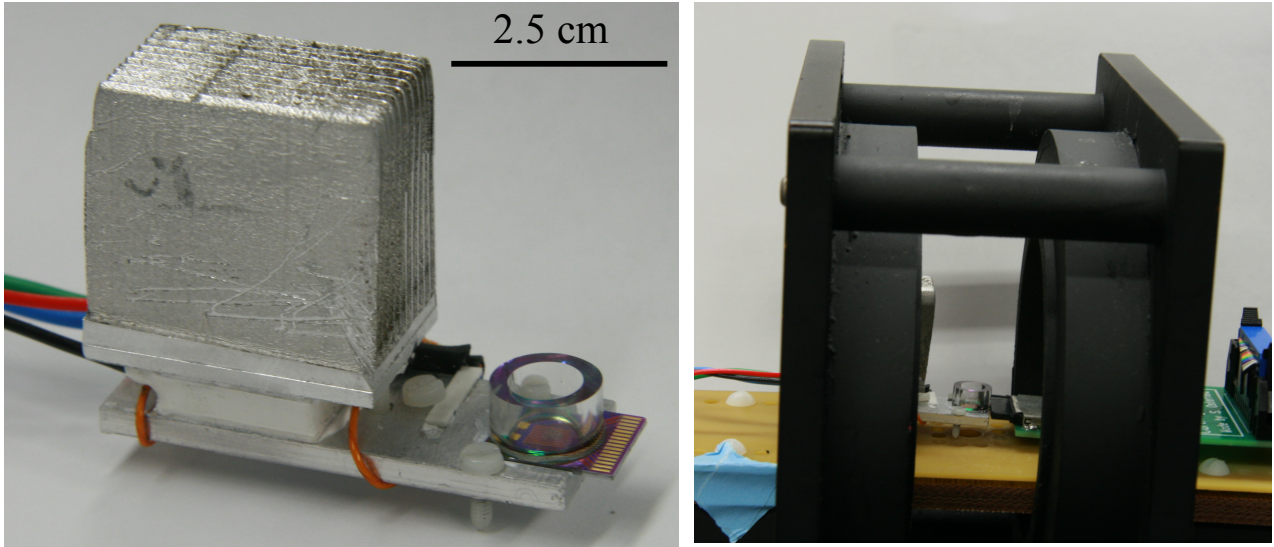

**Figure S4:** (Left) GMR biosensor array mounted in the temperature controlled holder. The temperature of the aluminium holder is controlled by a Peltier element and a Pt1000 thermometer. (Right) Chip and temperature control system mounted in the Helmholtz coils for magnetic measurements.

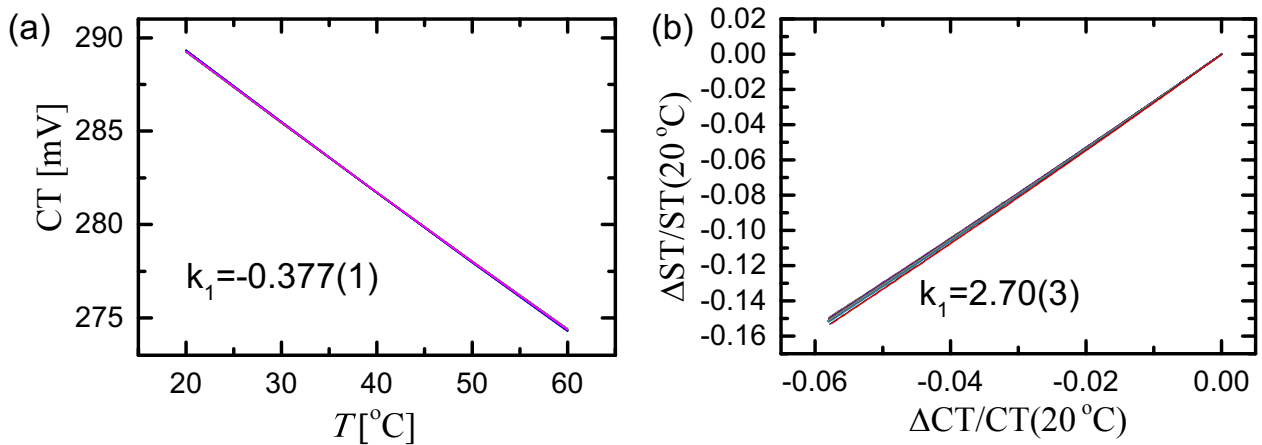

**Figure S5:** (a) Measured temperature dependence of sensor center tone (CT). The signal was measured at 20,40,50,60°C. All sensors showed a linear temperature dependence and a similar first order polynomial coefficient  $k_1$ . (b) Temperature dependence of the side tone (ST) signal. Due to the results of panel (a), the dependence is plotted against CT. The curve was measured during a downward temperature ramp from 65 °C to 20 °C. In only one chip (data not shown) the temperature dependence was found to be non-linear at high temperature ( $T > 45^\circ\text{C}$ ) and a 5<sup>th</sup> order polynomial fitting was used to correct the data.
